# Supplementary material
Source: PubMed Central journal article supplement (PMC59820)

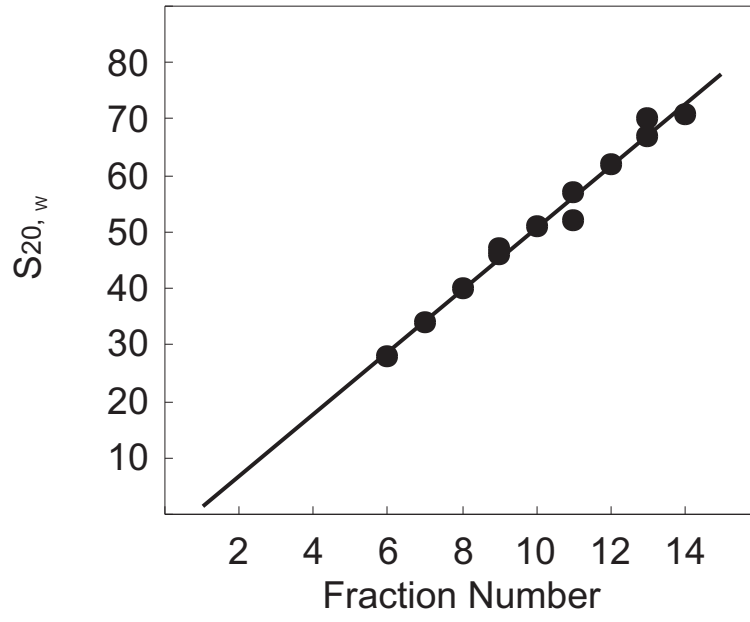

Supplement: pnas_98_21_11949__3.pdf [file pnas_98_21_11949__3.pdf]

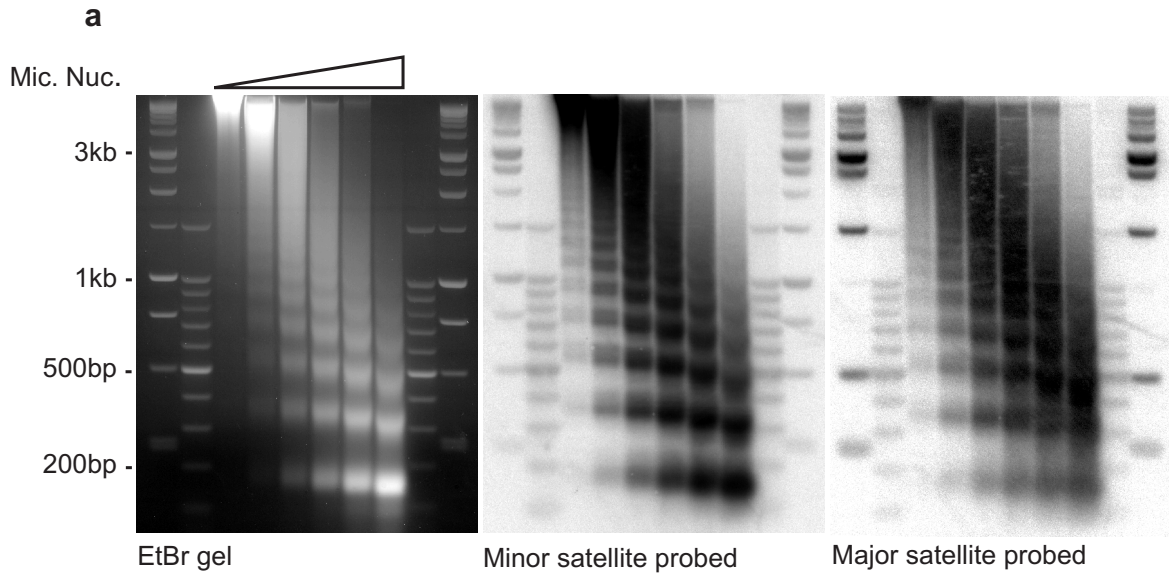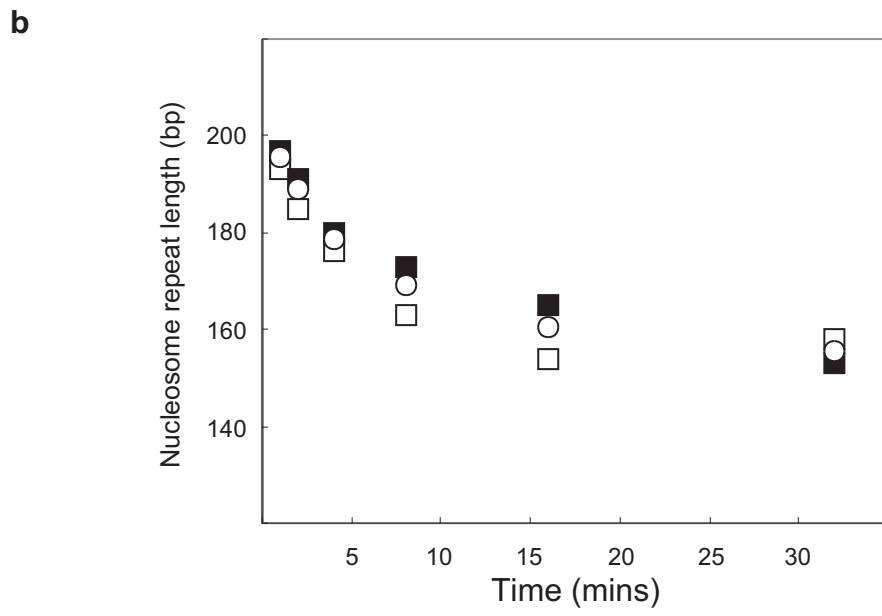

Supplement: pnas_98_21_11949__4.pdf [file pnas_98_21_11949__4.pdf]
